# Supplementary material
Source: ML conference proceedings conference paper supplement (https://openreview.net/forum?id=1sJWR4y1lG)
Supplement: supplementary_material [file attachment]

## Appendix

### A NEURAL PATH FRAMEWORK FOR CNN

**Indexing:** The weights of layers  $l \in [d_{cv}]$  are denoted by  $\Theta(i_{cv}, i_{in}, i_{out}, l)$  and for layers  $l \in [d_{fc}] + d_{cv}$  are denoted by  $\Theta(i_{in}, i_{out}, l)$ . The pre-activations, gating and hidden unit outputs are denoted by  $q_{x,\Theta}(i_{fout}, i_{out}, l)$ ,  $G_{x,\Theta}(i_{fout}, i_{out}, l)$ , and  $z_{x,\Theta}(i_{fout}, i_{out}, l)$  for layers  $l = 1, \dots, d_{cv}$ .  $i_{in}$  and  $i_{out}$  are used to index the input and the output filters.  $i_{fout}$  is used to denote the index of hidden unit (in the feature dimension) within the input and output filters.

**Shapes:** Appendix A shows the shapes of the tensors in the convolutional layers of a 1-dimensional circular CNN considered in this paper. Here, the input is a 1-dimensional tensor given by  $x \in \mathbb{R}^{d_{in}}$ . The hidden nodes in a given convolutional layer have a 2-dimensional shape of  $d_{in} \times w$ , where  $w$  is the number of filters in the layer. The weights of a given convolutional layer have 3-dimensional shape of  $w_{cv} \times w \times w$ , where  $w \times w$  is because of the number of input filters times the number of output filters.

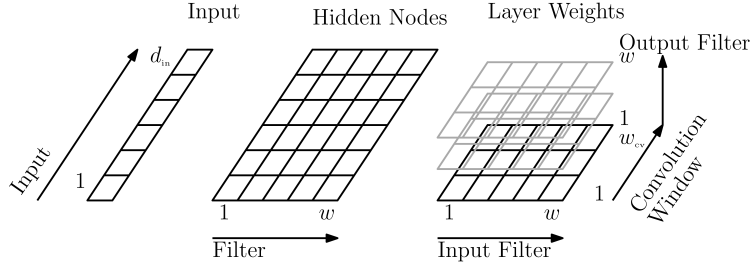

Figure 6: Shows the shape of the tensor.

#### A.0.1 INFORMATION FLOW

|                                                         |   |                                      |   |                                                                                                                            |
|---------------------------------------------------------|---|--------------------------------------|---|----------------------------------------------------------------------------------------------------------------------------|
| IL                                                      | : | $z_{x,\Theta}(\cdot, 1, 0)$          | = | $x$                                                                                                                        |
| Convolutional Layers, $l \in [d_{cv}]$                  |   |                                      |   |                                                                                                                            |
| PA                                                      | : | $q_{x,\Theta}(i_{fout}, i_{out}, l)$ | = | $\sum_{i_{cv}, i_{in}} \Theta(i_{cv}, i_{in}, i_{out}, l) \cdot z_{x,\Theta}(i_{fout} \oplus (i_{cv} - 1), i_{in}, l - 1)$ |
| GV                                                      | : | $G_{x,\Theta}(i_{fout}, i_{out}, l)$ | = | $\mathbf{1}_{\{q_{x,\Theta}(i_{fout}, i_{out}, l) > 0\}}$                                                                  |
| HUO                                                     | : | $z_{x,\Theta}(i_{fout}, i_{out}, l)$ | = | $q_{x,\Theta}(i_{fout}, i_{out}, l) \cdot G_{x,\Theta}(i_{fout}, i_{out}, l)$                                              |
| GAP Layers, $l = d_{cv} + 1$                            |   |                                      |   |                                                                                                                            |
| HUO                                                     | : | $z_{x,\Theta}(i_{out}, d_{cv} + 1)$  | = | $\sum_{i_{fout}} z_{x,\Theta}(i_{fout}, i_{out}, d_{cv}) \cdot G_{x,\Theta}^{pool}(i_{fout}, i_{out}, d_{cv} + 1)$         |
| Fully Connected Layers, $l \in [d_{fc}] + (d_{cv} + 1)$ |   |                                      |   |                                                                                                                            |
| PA                                                      | : | $q_{x,\Theta}(i_{out}, l)$           | = | $\sum_{i_{in}} \Theta(i_{in}, i_{out}, l) \cdot z_{x,\Theta}(i_{in}, l - 1)$                                               |
| GV                                                      | : | $G_{x,\Theta}(i_{out}, l)$           | = | $\mathbf{1}_{\{(q_{x,\Theta}(i_{out}, l)) > 0\}}$                                                                          |
| HUO                                                     | : | $z_{x,\Theta}(i_{out}, l)$           | = | $q_{x,\Theta}(i_{out}, l) \cdot G_{x,\Theta}(i_{out}, l)$                                                                  |
| FO                                                      | : | $\hat{y}_{\Theta}(x)$                | = | $\sum_{i_{in}} \Theta(i_{in}, i_{out}, d) \cdot z_{x,\Theta}(i_{in}, d - 1)$                                               |

Table 2: Here IL, PA, GV, HUO, GL and FO are abbreviations for input layer, pre-activation, gating values, hidden unit output, GAP-layer and final output respectively.

### B PROOFS OF TECHNICAL RESULTS

Proof of Proposition 3.2

*Proof.* Note that the total number of paths is  $P = d_{in} \cdot (w_{cv} \cdot w)^{d_{cv}} \cdot w_{fc}^{(d_{fc}-1)}$ , and in the definition of NPV for CNNs in Definition 3.3 the indices are over only the weights without specifying the input node given by  $\mathcal{I}_0^f(p)$ .  $\square$

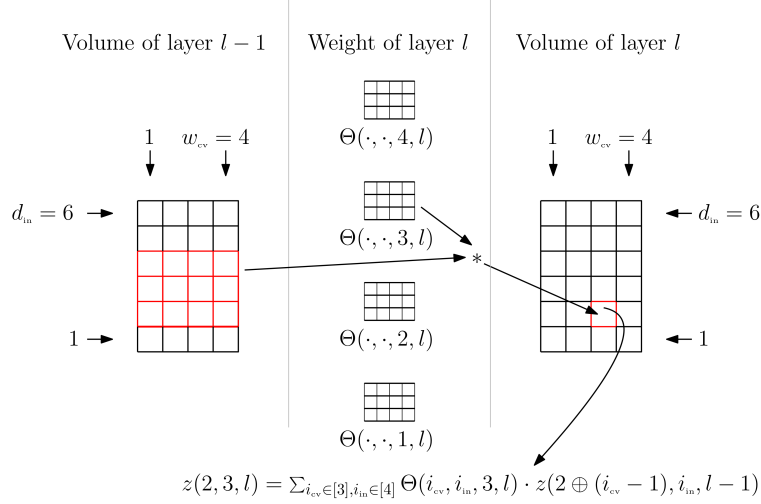

Proof of [Proposition 3.3](#)

*Proof.* For  $l = 0$ , we have  $z_{rot(x,r),\Theta}(i_{fout}, 1, 0) = rot(x, r)(i_{fout}) = x(i_{fout} \oplus r) = z_{x,\Theta}(i_{fout} \oplus r, 1, 0)$ . Now for  $l = 1$ , we have

$$\begin{aligned}
 q_{rot(x,r),\Theta}(i_{fout}, \cdot, 1) &= \sum_{i_{in} \in [1], i_{cv} \in [w_{cv}]} \Theta(i_{cv}, i_{in}, i_{out}, l) \cdot z_{rot(x,r),\Theta}(i_{fout} \oplus (i_{cv} - 1), i_{in}, 0) \\
 &= \sum_{i_{in} \in [1], i_{cv} \in [w_{cv}]} \Theta(i_{cv}, i_{in}, i_{out}, l) \cdot z_{x,\Theta}((i_{fout} \oplus r) \oplus (i_{cv} - 1), i_{in}, 0) \\
 &= q_{x,\Theta}(i_{fout} \oplus r, \cdot, 1)
 \end{aligned}$$

The proof follows by noting that  $G = \mathbf{1}_{\{q>0\}}$ , and  $z = q \cdot G$ , and repeating the above argument for the layer  $l = 2, \dots, d_{cv}$ .  $\square$

Proof of [Lemma 4.2](#)

*Proof.*

$$\begin{aligned}
 \langle \phi_{x_s, \Theta}, \phi_{x_{s'}, \Theta} \rangle &= \sum_{p \in [P]} x_s(\mathcal{I}_0(p)) x_{s'}(\mathcal{I}_0(p)) A_{\Theta}(x_s, p) A_{\Theta}(x_{s'}, p) \\
 &= \sum_{i=1}^{d_{in}} x_s(i) x_{s'}(i) \Lambda_{\Theta}(i, x_s, x_{s'}) \\
 &= \langle x_s, x_{s'} \rangle_{\Lambda_{\Theta}(\cdot, x_s, x_{s'})}
 \end{aligned} \tag{1}$$

Owing to the symmetry in a fully connected network, we have  $\Lambda(i, x_s, x_{s'})$  to be the same for all values of  $i \in [d_{in}]$ . And since  $H_{l,\Theta}^{lyr}(s, s')$  measure the number of gates in layer ‘ $l$ ’ that are active for both inputs  $x_s$  and  $x_{s'}$ , the total number of paths active for both inputs is  $\Pi_{l=1}^{(d-1)} H_{l,\Theta}^{lyr}(s, s')$ .  $\square$

Proof of [Lemma 4.2](#)

*Proof.* Proof is complete by noting that the NPF of the ResNet is a concatenation of the NPFs of the  $2^b$  distinct sub-FC-DNNs within the ResNet architecture.  $\square$

Proof of [Lemma 4.3](#)

*Proof.* For the CNN architecture considered in this paper, each bundle has exactly  $d_{\text{in}}$  number of paths, each one corresponding to a distinct input node. For a bundle  $b_{\hat{p}}$ , let  $b_{\hat{p}}(i), i \in [d_{\text{in}}]$  denote the path starting from input node  $i$ .

$$\begin{aligned}
& \sum_{\hat{p} \in [\hat{P}]} \left( \sum_{i, i' \in [d_{\text{in}}]} x(i) x'(i') A_{\Theta}(x, b_{\hat{p}}(i)) A_{\Theta}(x', b_{\hat{p}}(i')) \right) \\
&= \sum_{\hat{p} \in [\hat{P}]} \left( \sum_{i \in [d_{\text{in}}], i' = i \oplus r, r \in \{0, \dots, d_{\text{in}} - 1\}} x(i) x'(i \oplus r) A_{\Theta}(x, b_{\hat{p}}(i)) A_{\Theta}(x', b_{\hat{p}}(i \oplus r)) \right) \\
&= \sum_{\hat{p} \in [\hat{P}]} \left( \sum_{i \in [d_{\text{in}}], r \in \{0, \dots, d_{\text{in}} - 1\}} x(i) \text{rot}(x', r)(i) A_{\Theta}(x, b_{\hat{p}}(i)) A_{\Theta}(\text{rot}(x', r), b_{\hat{p}}(i)) \right) \\
&= \sum_{r=0}^{d_{\text{in}}-1} \left( \sum_{i \in [d_{\text{in}}]} x(i) \text{rot}(x', r)(i) \sum_{\hat{p} \in [\hat{P}]} A_{\Theta}(x, b_{\hat{p}}(i)) A_{\Theta}(\text{rot}(x', r), b_{\hat{p}}(i)) \right) \\
&= \sum_{r=0}^{d_{\text{in}}-1} \left( \sum_{i \in [d_{\text{in}}]} x(i) \text{rot}(x', r)(i) \Lambda_{\Theta}(i, x, \text{rot}(x', r)) \right) \\
&= \sum_{r=0}^{d_{\text{in}}-1} \langle x, \text{rot}(x', r) \rangle_{\Lambda_{\Theta}(\cdot, x, \text{rot}(x', r))}
\end{aligned}$$

□

Proof of [Theorem 5.1](#) follows in the same manner as the proof Theorem 5.1 of [Lakshminarayanan and Singh \(2020\)](#).
